# Supplementary material for: The HERC1 ubiquitin ligase regulates presynaptic membrane dynamics of central synapses
Source: PubMed Central journal article supplement (PMC7374096; doi:10.1038/s41598-020-68970-8), 2020-07-21

# **The HERC1 ubiquitin ligase regulates presynaptic membrane dynamics of central synapses**

M<sup>a</sup> Angeles Montes-Fernández<sup>1¶</sup>, Eva M<sup>a</sup> Pérez-Villegas<sup>2¶</sup>, Francesc R. Garcia-Gonzalo<sup>3</sup>, Leonardo Pedrazza<sup>3</sup>, Jose Luis Rosa<sup>3</sup>, Guillermo Alvarez de Toledo<sup>1\*</sup>, José A. Armengol<sup>2\*</sup>

<sup>1</sup>Department of Medical Physiology and Biophysics, School of Medicine, University of Seville, Seville, Spain

<sup>2</sup>Department of Physiology, Anatomy and Cell Biology, University Pablo de Olavide, Seville, Spain.

<sup>3</sup>Department of Physiological Sciences, IDIBELL, University of Barcelona, Barcelona Spain

\* Corresponding authors

E-mail: [jaarmbut@upo.es](mailto:jaarmbut@upo.es) (JAA)

E-mail: [gat@us.es](mailto:gat@us.es) (GAT)

¶ These authors contributed equally to this work.

# RAW DATA

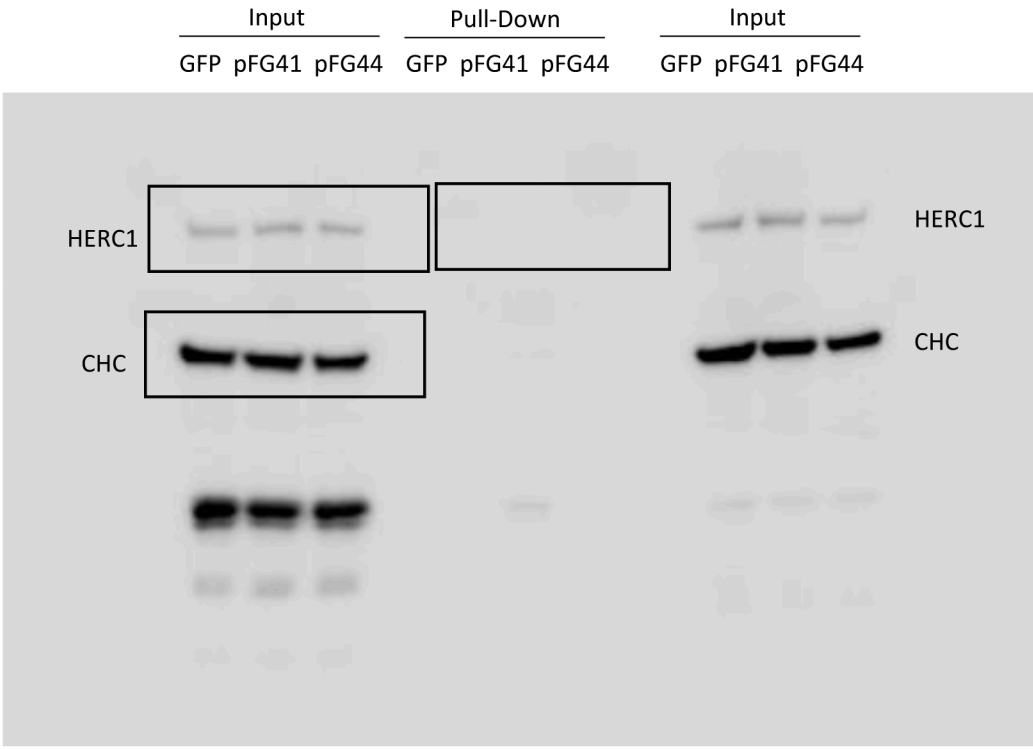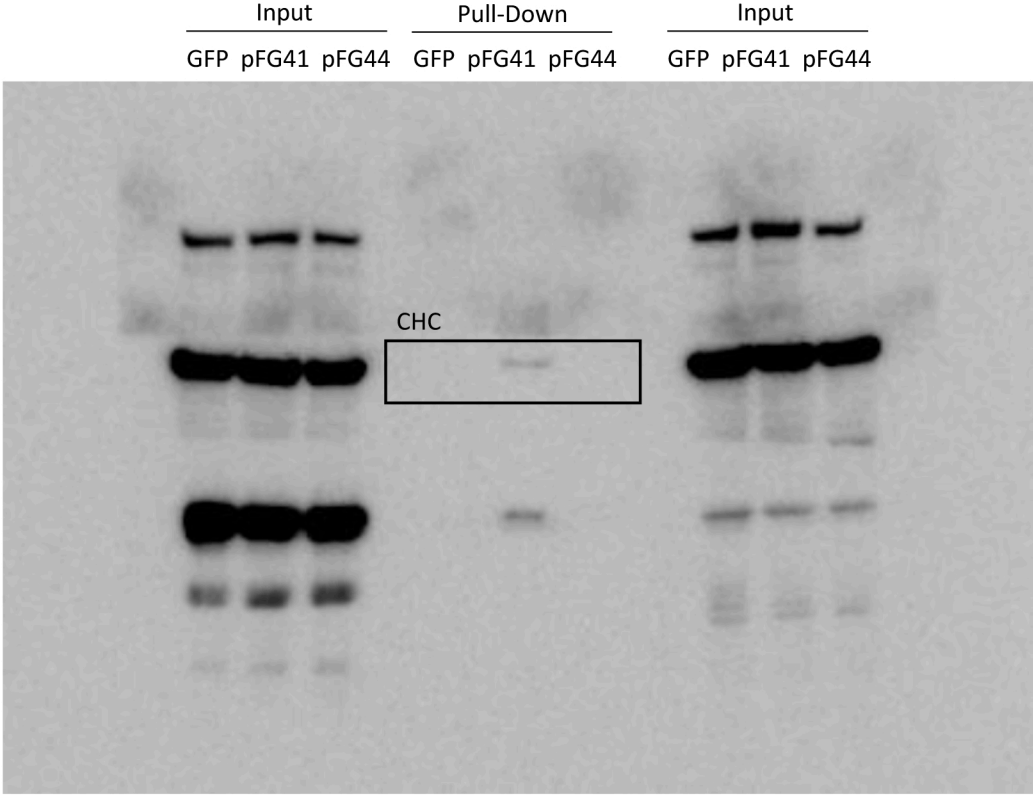

# RAW DATA

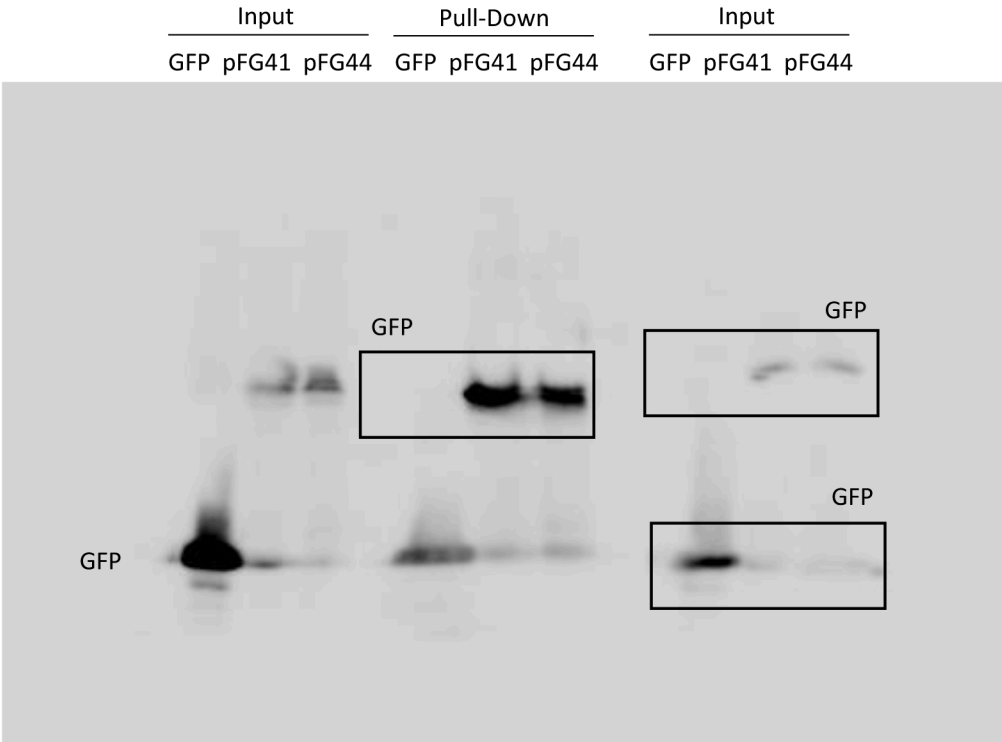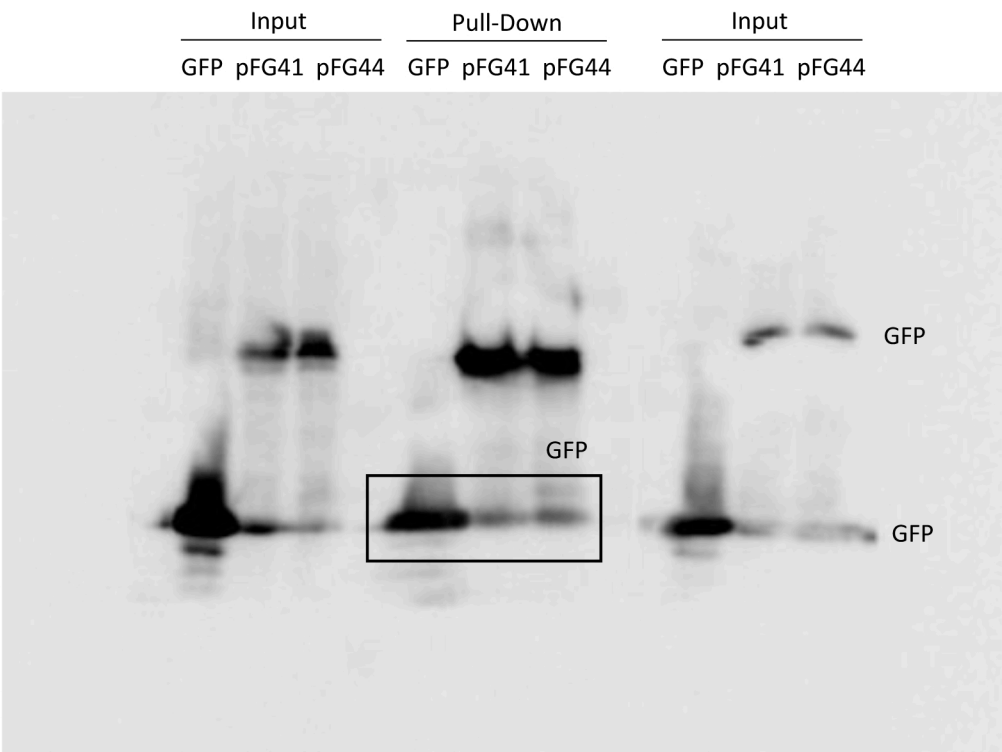

Supplement: 41598_2020_68970_MOESM1_ESM.pdf [file 41598_2020_68970_MOESM1_ESM.pdf]
